# Supplementary material
Source: Springer Nature journal article supplement (https://www.springermedizin.de/resource/supplementary/12933_2013_761_MOESM1_ESM.pdf/9539248)

# 1 : 2 Joinpoints

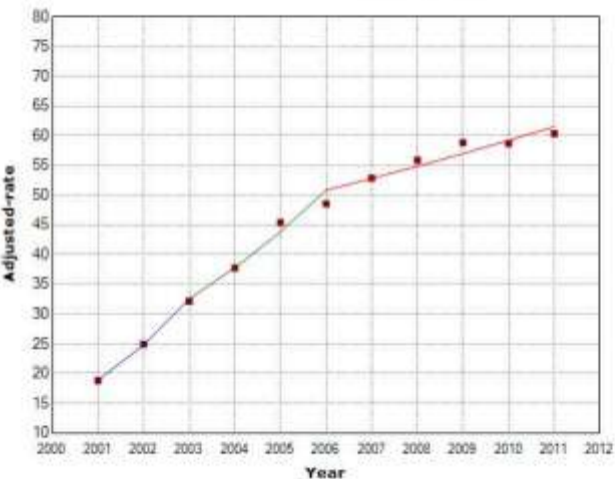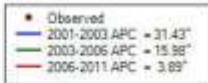

Supplement: MOESM1 [file 9539248]
